# Supplementary material
Source: PubMed Central journal article supplement (PMC3384547)
Supplement: NIHMS316527-supplement-supplement_1.pdf [file NIHMS316527-supplement-supplement_1.pdf]

# Supplementary Materials

## Appendix A Proof of Relations (16)

### A.1 The Subscripts $ije$ Do Not Contain 2

Notice

$$\begin{aligned}
 \frac{\partial f_{000}}{\partial P_{000}} &= \frac{\partial}{\partial P_{000}} \left[ P_{000} \log \frac{P_{000}}{P_{0..}P_{.0.}P_{..0}} \right] = \log \frac{P_{000}}{P_{0..}P_{.0.}P_{..0}} + \left[ 1 - \frac{P_{000}}{P_{0..}} - \frac{P_{000}}{P_{.0.}} - \frac{P_{000}}{P_{..0}} \right] \log e, \\
 \frac{\partial f_{001}}{\partial P_{000}} &= \frac{\partial}{\partial P_{000}} \left[ P_{001} \log \frac{P_{001}}{P_{0..}P_{.0.}P_{..1}} \right] = - \left[ \frac{P_{001}}{P_{0..}} + \frac{P_{001}}{P_{.0.}} \right] \log e, \\
 \frac{\partial f_{002}}{\partial P_{000}} &= \frac{\partial}{\partial P_{000}} \left[ P_{002} \log \frac{P_{002}}{P_{0..}P_{.0.}P_{..2}} \right] = \left[ -\frac{P_{002}}{P_{0..}} - \frac{P_{002}}{P_{.0.}} + \frac{P_{002}}{P_{..2}} \right] \log e, \\
 \frac{\partial f_{010}}{\partial P_{000}} &= \frac{\partial}{\partial P_{000}} \left[ P_{010} \log \frac{P_{010}}{P_{0..}P_{.1.}P_{..0}} \right] = - \left[ \frac{P_{010}}{P_{0..}} + \frac{P_{010}}{P_{..0}} \right] \log e, \\
 \frac{\partial f_{011}}{\partial P_{000}} &= \frac{\partial}{\partial P_{000}} \left[ P_{011} \log \frac{P_{011}}{P_{0..}P_{.1.}P_{..1}} \right] = -\frac{P_{011}}{P_{0..}} \log e, \\
 \frac{\partial f_{012}}{\partial P_{000}} &= \frac{\partial}{\partial P_{000}} \left[ P_{012} \log \frac{P_{012}}{P_{0..}P_{.1.}P_{..2}} \right] = \left[ -\frac{P_{012}}{P_{0..}} + \frac{P_{012}}{P_{..2}} \right] \log e, \\
 \frac{\partial f_{020}}{\partial P_{000}} &= \frac{\partial}{\partial P_{000}} \left[ P_{020} \log \frac{P_{020}}{P_{0..}P_{.2.}P_{..0}} \right] = \left[ -\frac{P_{020}}{P_{0..}} + \frac{P_{020}}{P_{.2.}} - \frac{P_{020}}{P_{..0}} \right] \log e, \\
 \frac{\partial f_{021}}{\partial P_{000}} &= \frac{\partial}{\partial P_{000}} \left[ P_{021} \log \frac{P_{021}}{P_{0..}P_{.2.}P_{..1}} \right] = \left[ -\frac{P_{021}}{P_{0..}} + \frac{P_{021}}{P_{.2.}} \right] \log e, \\
 \frac{\partial f_{022}}{\partial P_{000}} &= \frac{\partial}{\partial P_{000}} \left[ P_{022} \log \frac{P_{022}}{P_{0..}P_{.2.}P_{..2}} \right] = \left[ -\frac{P_{022}}{P_{0..}} + \frac{P_{022}}{P_{.2.}} + \frac{P_{022}}{P_{..2}} \right] \log e.
 \end{aligned} \tag{A.1}$$

In addition, we have

$$\begin{aligned}
 \frac{\partial f_{100}}{\partial P_{000}} &= \frac{\partial}{\partial P_{000}} \left[ P_{100} \log \frac{P_{100}}{P_{1..}P_{.0.}P_{..0}} \right] = - \left[ \frac{P_{100}}{P_{.0.}} + \frac{P_{100}}{P_{..0}} \right] \log e, \\
 \frac{\partial f_{101}}{\partial P_{000}} &= \frac{\partial}{\partial P_{000}} \left[ P_{101} \log \frac{P_{101}}{P_{1..}P_{.0.}P_{..1}} \right] = -\frac{P_{101}}{P_{.0.}} \log e, \\
 \frac{\partial f_{102}}{\partial P_{000}} &= \frac{\partial}{\partial P_{000}} \left[ P_{102} \log \frac{P_{102}}{P_{1..}P_{.0.}P_{..2}} \right] = \left[ -\frac{P_{102}}{P_{.0.}} + \frac{P_{102}}{P_{..2}} \right] \log e, \\
 \frac{\partial f_{110}}{\partial P_{000}} &= \frac{\partial}{\partial P_{000}} \left[ P_{110} \log \frac{P_{110}}{P_{1..}P_{.1.}P_{..0}} \right] = -\frac{P_{110}}{P_{.0.}} \log e, \\
 \frac{\partial f_{111}}{\partial P_{000}} &= \frac{\partial}{\partial P_{000}} \left[ P_{111} \log \frac{P_{111}}{P_{1..}P_{.1.}P_{..1}} \right] = 0, \\
 \frac{\partial f_{112}}{\partial P_{000}} &= \frac{\partial}{\partial P_{000}} \left[ P_{112} \log \frac{P_{112}}{P_{1..}P_{.1.}P_{..2}} \right] = \frac{P_{112}}{P_{.2.}} \log e, \\
 \frac{\partial f_{120}}{\partial P_{000}} &= \frac{\partial}{\partial P_{000}} \left[ P_{120} \log \frac{P_{120}}{P_{1..}P_{.2.}P_{..0}} \right] = \left[ \frac{P_{120}}{P_{.2.}} - \frac{P_{120}}{P_{..0}} \right] \log e,
 \end{aligned} \tag{A.2}$$

$$\begin{aligned}\frac{\partial f_{121}}{\partial P_{000}} &= \frac{\partial}{\partial P_{000}} \left[ P_{121} \log \frac{P_{121}}{P_{1..}P_{.2.}P_{..1}} \right] = \frac{P_{121}}{P_{.2.}} \log e, \\ \frac{\partial f_{122}}{\partial P_{000}} &= \frac{\partial}{\partial P_{000}} \left[ P_{122} \log \frac{P_{122}}{P_{1..}P_{.2.}P_{..2}} \right] = \left[ \frac{P_{122}}{P_{.2.}} + \frac{P_{122}}{P_{..2}} \right] \log e,\end{aligned}$$

and

$$\begin{aligned}\frac{\partial f_{200}}{\partial P_{000}} &= \frac{\partial}{\partial P_{000}} \left[ P_{200} \log \frac{P_{200}}{P_{2..}P_{.0.}P_{..0}} \right] = \left[ \frac{P_{200}}{P_{2..}} - \frac{P_{200}}{P_{.0.}} - \frac{P_{200}}{P_{..0}} \right] \log e, \\ \frac{\partial f_{201}}{\partial P_{000}} &= \frac{\partial}{\partial P_{000}} \left[ P_{201} \log \frac{P_{201}}{P_{2..}P_{.0.}P_{..1}} \right] = \left[ \frac{P_{201}}{P_{2..}} - \frac{P_{201}}{P_{.0.}} \right] \log e, \\ \frac{\partial f_{202}}{\partial P_{000}} &= \frac{\partial}{\partial P_{000}} \left[ P_{202} \log \frac{P_{202}}{P_{2..}P_{.0.}P_{..2}} \right] = \left[ \frac{P_{202}}{P_{2..}} - \frac{P_{202}}{P_{.0.}} + \frac{P_{202}}{P_{..2}} \right] \log e, \\ \frac{\partial f_{210}}{\partial P_{000}} &= \frac{\partial}{\partial P_{000}} \left[ P_{210} \log \frac{P_{210}}{P_{2..}P_{.1.}P_{..0}} \right] = \left[ \frac{P_{210}}{P_{2..}} - \frac{P_{210}}{P_{.1.}} \right] \log e, \\ \frac{\partial f_{211}}{\partial P_{000}} &= \frac{\partial}{\partial P_{000}} \left[ P_{211} \log \frac{P_{211}}{P_{2..}P_{.1.}P_{..1}} \right] = \frac{P_{211}}{P_{2..}} \log e, \\ \frac{\partial f_{212}}{\partial P_{000}} &= \frac{\partial}{\partial P_{000}} \left[ P_{212} \log \frac{P_{212}}{P_{2..}P_{.1.}P_{..2}} \right] = \left[ \frac{P_{212}}{P_{2..}} + \frac{P_{212}}{P_{..2}} \right] \log e, \\ \frac{\partial f_{220}}{\partial P_{000}} &= \frac{\partial}{\partial P_{000}} \left[ P_{220} \log \frac{P_{220}}{P_{2..}P_{.2.}P_{..0}} \right] = \left[ \frac{P_{220}}{P_{2..}} + \frac{P_{220}}{P_{.2.}} - \frac{P_{220}}{P_{..0}} \right] \log e, \\ \frac{\partial f_{221}}{\partial P_{000}} &= \frac{\partial}{\partial P_{000}} \left[ P_{221} \log \frac{P_{221}}{P_{2..}P_{.2.}P_{..1}} \right] = \left[ \frac{P_{221}}{P_{2..}} + \frac{P_{221}}{P_{.2.}} \right] \log e, \\ \frac{\partial f_{222}}{\partial P_{000}} &= \frac{\partial}{\partial P_{000}} \left[ P_{222} \log \frac{P_{222}}{P_{2..}P_{.2.}P_{..2}} \right] = -\log \frac{P_{222}}{P_{2..}P_{.2.}P_{..2}} + \left[ -1 + \frac{P_{222}}{P_{2..}} + \frac{P_{222}}{P_{.2.}} + \frac{P_{222}}{P_{..2}} \right] \log e.\end{aligned} \tag{A.3}$$

By relations (A.1), (A.2), and (A.3), we have

$$\begin{aligned}\frac{\partial f}{\partial P_{000}} &= \sum_{i=0}^2 \sum_{j=0}^2 \sum_{e=0}^2 \frac{\partial f_{ije}}{\partial P_{000}} \\ &= \log \frac{P_{000}}{P_{0..}P_{.0.}P_{..0}} - \log \frac{P_{222}}{P_{2..}P_{.2.}P_{..2}}.\end{aligned}$$

Similarly, we have for  $i, j, e = 0, 1$

$$\frac{\partial f}{\partial P_{ije}} = \log \frac{P_{ije}}{P_{i..}P_{.j.}P_{..e}} - \log \frac{P_{222}}{P_{2..}P_{.2.}P_{..2}}.$$

## A.2 The Subscripts $ije$ Contain One 2

Notice

$$\frac{\partial f_{000}}{\partial P_{002}} = \frac{\partial}{\partial P_{002}} \left[ P_{000} \log \frac{P_{000}}{P_{0..}P_{.0.}P_{..0}} \right] = \left[ -\frac{P_{000}}{P_{0..}} - \frac{P_{000}}{P_{.0.}} \right] \log e,$$

$$\begin{aligned}
\frac{\partial f_{001}}{\partial P_{002}} &= \frac{\partial}{\partial P_{002}} \left[ P_{001} \log \frac{P_{001}}{P_{0..}P_{.0}P_{..1}} \right] = \left[ -\frac{P_{001}}{P_{0..}} - \frac{P_{001}}{P_{.0}} \right] \log e, \\
\frac{\partial f_{002}}{\partial P_{002}} &= \frac{\partial}{\partial P_{002}} \left[ P_{002} \log \frac{P_{002}}{P_{0..}P_{.0}P_{..2}} \right] = \log \frac{P_{002}}{P_{0..}P_{.0}P_{..2}} + \left[ 1 - \frac{P_{002}}{P_{0..}} - \frac{P_{002}}{P_{.0}} \right] \log e, \\
\frac{\partial f_{010}}{\partial P_{002}} &= \frac{\partial}{\partial P_{002}} \left[ P_{010} \log \frac{P_{010}}{P_{0..}P_{.1}P_{..0}} \right] = -\frac{P_{010}}{P_{0..}} \log e, \\
\frac{\partial f_{011}}{\partial P_{002}} &= \frac{\partial}{\partial P_{002}} \left[ P_{011} \log \frac{P_{011}}{P_{0..}P_{.1}P_{..1}} \right] = -\frac{P_{011}}{P_{0..}} \log e, \\
\frac{\partial f_{012}}{\partial P_{002}} &= \frac{\partial}{\partial P_{002}} \left[ P_{012} \log \frac{P_{012}}{P_{0..}P_{.1}P_{..2}} \right] = -\frac{P_{012}}{P_{0..}} \log e, \\
\frac{\partial f_{020}}{\partial P_{002}} &= \frac{\partial}{\partial P_{002}} \left[ P_{020} \log \frac{P_{020}}{P_{0..}P_{.2}P_{..0}} \right] = \left[ -\frac{P_{020}}{P_{0..}} + \frac{P_{020}}{P_{.2}} \right] \log e, \\
\frac{\partial f_{021}}{\partial P_{002}} &= \frac{\partial}{\partial P_{002}} \left[ P_{021} \log \frac{P_{021}}{P_{0..}P_{.2}P_{..1}} \right] = \left[ -\frac{P_{021}}{P_{0..}} + \frac{P_{021}}{P_{.2}} \right] \log e, \\
\frac{\partial f_{022}}{\partial P_{002}} &= \frac{\partial}{\partial P_{002}} \left[ P_{022} \log \frac{P_{022}}{P_{0..}P_{.2}P_{..2}} \right] = \left[ -\frac{P_{022}}{P_{0..}} + \frac{P_{022}}{P_{.2}} \right] \log e.
\end{aligned} \tag{A.4}$$

In addition, we have

$$\begin{aligned}
\frac{\partial f_{100}}{\partial P_{002}} &= \frac{\partial}{\partial P_{002}} \left[ P_{100} \log \frac{P_{100}}{P_{1..}P_{.0}P_{..0}} \right] = -\frac{P_{100}}{P_{.0}} \log e, \\
\frac{\partial f_{101}}{\partial P_{002}} &= \frac{\partial}{\partial P_{002}} \left[ P_{101} \log \frac{P_{101}}{P_{1..}P_{.0}P_{..1}} \right] = -\frac{P_{101}}{P_{.0}} \log e, \\
\frac{\partial f_{102}}{\partial P_{002}} &= \frac{\partial}{\partial P_{002}} \left[ P_{102} \log \frac{P_{102}}{P_{1..}P_{.0}P_{..2}} \right] = -\frac{P_{102}}{P_{.0}} \log e, \\
\frac{\partial f_{110}}{\partial P_{002}} &= \frac{\partial}{\partial P_{002}} \left[ P_{110} \log \frac{P_{110}}{P_{1..}P_{.1}P_{..0}} \right] = 0, \\
\frac{\partial f_{111}}{\partial P_{002}} &= \frac{\partial}{\partial P_{002}} \left[ P_{111} \log \frac{P_{111}}{P_{1..}P_{.1}P_{..1}} \right] = 0, \\
\frac{\partial f_{112}}{\partial P_{002}} &= \frac{\partial}{\partial P_{002}} \left[ P_{112} \log \frac{P_{112}}{P_{1..}P_{.1}P_{..2}} \right] = 0, \\
\frac{\partial f_{120}}{\partial P_{002}} &= \frac{\partial}{\partial P_{002}} \left[ P_{120} \log \frac{P_{120}}{P_{1..}P_{.2}P_{..0}} \right] = \frac{P_{120}}{P_{.2}} \log e, \\
\frac{\partial f_{121}}{\partial P_{002}} &= \frac{\partial}{\partial P_{002}} \left[ P_{121} \log \frac{P_{121}}{P_{1..}P_{.2}P_{..1}} \right] = \frac{P_{121}}{P_{.2}} \log e, \\
\frac{\partial f_{122}}{\partial P_{002}} &= \frac{\partial}{\partial P_{002}} \left[ P_{122} \log \frac{P_{122}}{P_{1..}P_{.2}P_{..2}} \right] = \frac{P_{122}}{P_{.2}} \log e,
\end{aligned} \tag{A.5}$$

and

$$\begin{aligned}
\frac{\partial f_{200}}{\partial P_{002}} &= \frac{\partial}{\partial P_{002}} \left[ P_{200} \log \frac{P_{200}}{P_{2..}P_{.0}P_{..0}} \right] = \left[ \frac{P_{200}}{P_{2..}} - \frac{P_{200}}{P_{.0}} \right] \log e, \\
\frac{\partial f_{201}}{\partial P_{002}} &= \frac{\partial}{\partial P_{002}} \left[ P_{201} \log \frac{P_{201}}{P_{2..}P_{.0}P_{..1}} \right] = \left[ \frac{P_{201}}{P_{2..}} - \frac{P_{201}}{P_{.0}} \right] \log e,
\end{aligned}$$

$$\begin{aligned}
\frac{\partial f_{202}}{\partial P_{002}} &= \frac{\partial}{\partial P_{002}} \left[ P_{202} \log \frac{P_{202}}{P_{2..}P_{.0}P_{..2}} \right] = \left[ \frac{P_{202}}{P_{2..}} - \frac{P_{202}}{P_{.0}} \right] \log e, \\
\frac{\partial f_{210}}{\partial P_{002}} &= \frac{\partial}{\partial P_{002}} \left[ P_{210} \log \frac{P_{210}}{P_{2..}P_{.1}P_{..0}} \right] = \frac{P_{210}}{P_{2..}} \log e, \\
\frac{\partial f_{211}}{\partial P_{002}} &= \frac{\partial}{\partial P_{002}} \left[ P_{211} \log \frac{P_{211}}{P_{2..}P_{.1}P_{..1}} \right] = \frac{P_{211}}{P_{2..}} \log e, \\
\frac{\partial f_{212}}{\partial P_{002}} &= \frac{\partial}{\partial P_{002}} \left[ P_{212} \log \frac{P_{212}}{P_{2..}P_{.1}P_{..2}} \right] = \frac{P_{212}}{P_{2..}} \log e, \\
\frac{\partial f_{220}}{\partial P_{002}} &= \frac{\partial}{\partial P_{002}} \left[ P_{220} \log \frac{P_{220}}{P_{2..}P_{.2}P_{..0}} \right] = \left[ \frac{P_{220}}{P_{2..}} + \frac{P_{220}}{P_{.2}} \right] \log e, \\
\frac{\partial f_{221}}{\partial P_{002}} &= \frac{\partial}{\partial P_{002}} \left[ P_{221} \log \frac{P_{221}}{P_{2..}P_{.2}P_{..1}} \right] = \left[ \frac{P_{221}}{P_{2..}} + \frac{P_{221}}{P_{.2}} \right] \log e, \\
\frac{\partial f_{222}}{\partial P_{002}} &= \frac{\partial}{\partial P_{002}} \left[ P_{222} \log \frac{P_{222}}{P_{2..}P_{.2}P_{..2}} \right] = -\log \frac{P_{222}}{P_{2..}P_{.2}P_{..2}} + \left[ -1 + \frac{P_{222}}{P_{2..}} + \frac{P_{222}}{P_{.2}} \right] \log e.
\end{aligned} \tag{A.6}$$

By relations (A.4), (A.5), and (A.6), we have

$$\begin{aligned}
\frac{\partial f}{\partial P_{002}} &= \sum_{i=0}^2 \sum_{j=0}^2 \sum_{\epsilon=0}^2 \frac{\partial f_{ije}}{\partial P_{002}} \\
&= \log \frac{P_{002}}{P_{0..}P_{.0}P_{..2}} - \log \frac{P_{222}}{P_{2..}P_{.2}P_{..2}}.
\end{aligned}$$

Similarly, we have

$$\begin{aligned}
\frac{\partial f}{\partial P_{012}} &= \log \frac{P_{012}}{P_{0..}P_{.1}P_{..2}} - \log \frac{P_{222}}{P_{2..}P_{.2}P_{..2}}, \\
\frac{\partial f}{\partial P_{020}} &= \log \frac{P_{020}}{P_{0..}P_{.2}P_{..0}} - \log \frac{P_{222}}{P_{2..}P_{.2}P_{..2}}, \\
\frac{\partial f}{\partial P_{021}} &= \log \frac{P_{021}}{P_{0..}P_{.2}P_{..1}} - \log \frac{P_{222}}{P_{2..}P_{.2}P_{..2}}, \\
\frac{\partial f}{\partial P_{102}} &= \log \frac{P_{102}}{P_{1..}P_{.0}P_{..2}} - \log \frac{P_{222}}{P_{2..}P_{.2}P_{..2}}, \\
\frac{\partial f}{\partial P_{112}} &= \log \frac{P_{112}}{P_{1..}P_{.1}P_{..2}} - \log \frac{P_{222}}{P_{2..}P_{.2}P_{..2}}, \\
\frac{\partial f}{\partial P_{120}} &= \log \frac{P_{120}}{P_{1..}P_{.2}P_{..0}} - \log \frac{P_{222}}{P_{2..}P_{.2}P_{..2}}, \\
\frac{\partial f}{\partial P_{121}} &= \log \frac{P_{121}}{P_{1..}P_{.2}P_{..1}} - \log \frac{P_{222}}{P_{2..}P_{.2}P_{..2}}, \\
\frac{\partial f}{\partial P_{200}} &= \log \frac{P_{200}}{P_{2..}P_{.0}P_{..0}} - \log \frac{P_{222}}{P_{2..}P_{.2}P_{..2}}, \\
\frac{\partial f}{\partial P_{201}} &= \log \frac{P_{201}}{P_{2..}P_{.0}P_{..1}} - \log \frac{P_{222}}{P_{2..}P_{.2}P_{..2}},
\end{aligned}$$

$$\begin{aligned}\frac{\partial f}{\partial P_{210}} &= \log \frac{P_{210}}{P_{2..}P_{.1}P_{.0}} - \log \frac{P_{222}}{P_{2..}P_{.2}P_{.2}}, \\ \frac{\partial f}{\partial P_{211}} &= \log \frac{P_{211}}{P_{2..}P_{.1}P_{.1}} - \log \frac{P_{222}}{P_{2..}P_{.2}P_{.2}}.\end{aligned}$$

### A.3 The Subscripts $ije$ Contain Two 2

Notice

$$\begin{aligned}\frac{\partial f_{000}}{\partial P_{122}} &= \frac{\partial}{\partial P_{122}} \left[ P_{000} \log \frac{P_{000}}{P_{0..}P_{.0}P_{.0}} \right] = 0, \\ \frac{\partial f_{001}}{\partial P_{122}} &= \frac{\partial}{\partial P_{122}} \left[ P_{001} \log \frac{P_{001}}{P_{0..}P_{.0}P_{.1}} \right] = 0, \\ \frac{\partial f_{002}}{\partial P_{122}} &= \frac{\partial}{\partial P_{122}} \left[ P_{002} \log \frac{P_{002}}{P_{0..}P_{.0}P_{.2}} \right] = 0, \\ \frac{\partial f_{010}}{\partial P_{122}} &= \frac{\partial}{\partial P_{122}} \left[ P_{010} \log \frac{P_{010}}{P_{0..}P_{.1}P_{.0}} \right] = 0, \\ \frac{\partial f_{011}}{\partial P_{122}} &= \frac{\partial}{\partial P_{122}} \left[ P_{011} \log \frac{P_{011}}{P_{0..}P_{.1}P_{.1}} \right] = 0, \\ \frac{\partial f_{012}}{\partial P_{122}} &= \frac{\partial}{\partial P_{122}} \left[ P_{012} \log \frac{P_{012}}{P_{0..}P_{.1}P_{.2}} \right] = 0, \\ \frac{\partial f_{020}}{\partial P_{122}} &= \frac{\partial}{\partial P_{122}} \left[ P_{020} \log \frac{P_{020}}{P_{0..}P_{.2}P_{.0}} \right] = 0, \\ \frac{\partial f_{021}}{\partial P_{122}} &= \frac{\partial}{\partial P_{122}} \left[ P_{021} \log \frac{P_{021}}{P_{0..}P_{.2}P_{.1}} \right] = 0, \\ \frac{\partial f_{022}}{\partial P_{122}} &= \frac{\partial}{\partial P_{122}} \left[ P_{022} \log \frac{P_{022}}{P_{0..}P_{.2}P_{.2}} \right] = 0.\end{aligned}\tag{A.7}$$

In addition, we have

$$\begin{aligned}\frac{\partial f_{100}}{\partial P_{122}} &= \frac{\partial}{\partial P_{122}} \left[ P_{100} \log \frac{P_{100}}{P_{1..}P_{.0}P_{.0}} \right] = -\frac{P_{100}}{P_{1..}} \log e, \\ \frac{\partial f_{101}}{\partial P_{122}} &= \frac{\partial}{\partial P_{122}} \left[ P_{101} \log \frac{P_{101}}{P_{1..}P_{.0}P_{.1}} \right] = -\frac{P_{101}}{P_{1..}} \log e, \\ \frac{\partial f_{102}}{\partial P_{122}} &= \frac{\partial}{\partial P_{122}} \left[ P_{102} \log \frac{P_{102}}{P_{1..}P_{.0}P_{.2}} \right] = -\frac{P_{102}}{P_{1..}} \log e, \\ \frac{\partial f_{110}}{\partial P_{122}} &= \frac{\partial}{\partial P_{122}} \left[ P_{110} \log \frac{P_{110}}{P_{1..}P_{.1}P_{.0}} \right] = -\frac{P_{110}}{P_{1..}} \log e, \\ \frac{\partial f_{111}}{\partial P_{122}} &= \frac{\partial}{\partial P_{122}} \left[ P_{111} \log \frac{P_{111}}{P_{1..}P_{.1}P_{.1}} \right] = -\frac{P_{111}}{P_{1..}} \log e, \\ \frac{\partial f_{112}}{\partial P_{122}} &= \frac{\partial}{\partial P_{122}} \left[ P_{112} \log \frac{P_{112}}{P_{1..}P_{.1}P_{.2}} \right] = -\frac{P_{112}}{P_{1..}} \log e,\end{aligned}\tag{A.8}$$

$$\begin{aligned}
\frac{\partial f_{120}}{\partial P_{122}} &= \frac{\partial}{\partial P_{122}} \left[ P_{120} \log \frac{P_{120}}{P_{1..}P_{.2}P_{..0}} \right] = -\frac{P_{120}}{P_{1..}} \log e, \\
\frac{\partial f_{121}}{\partial P_{122}} &= \frac{\partial}{\partial P_{122}} \left[ P_{121} \log \frac{P_{121}}{P_{1..}P_{.2}P_{..1}} \right] = -\frac{P_{121}}{P_{1..}} \log e, \\
\frac{\partial f_{122}}{\partial P_{122}} &= \frac{\partial}{\partial P_{122}} \left[ P_{122} \log \frac{P_{122}}{P_{1..}P_{.2}P_{..2}} \right] = \log \frac{P_{122}}{P_{1..}P_{.2}P_{..2}} + \left[ 1 - \frac{P_{122}}{P_{1..}} \right] \log e,
\end{aligned}$$

and

$$\begin{aligned}
\frac{\partial f_{200}}{\partial P_{122}} &= \frac{\partial}{\partial P_{122}} \left[ P_{200} \log \frac{P_{200}}{P_{2..}P_{.0}P_{..0}} \right] = \frac{P_{200}}{P_{2..}} \log e, \\
\frac{\partial f_{201}}{\partial P_{122}} &= \frac{\partial}{\partial P_{122}} \left[ P_{201} \log \frac{P_{201}}{P_{2..}P_{.0}P_{..1}} \right] = \frac{P_{201}}{P_{2..}} \log e, \\
\frac{\partial f_{202}}{\partial P_{122}} &= \frac{\partial}{\partial P_{122}} \left[ P_{202} \log \frac{P_{202}}{P_{2..}P_{.0}P_{..2}} \right] = \frac{P_{202}}{P_{2..}} \log e, \\
\frac{\partial f_{210}}{\partial P_{122}} &= \frac{\partial}{\partial P_{122}} \left[ P_{210} \log \frac{P_{210}}{P_{2..}P_{.1}P_{..0}} \right] = \frac{P_{210}}{P_{2..}} \log e, \\
\frac{\partial f_{211}}{\partial P_{122}} &= \frac{\partial}{\partial P_{122}} \left[ P_{211} \log \frac{P_{211}}{P_{2..}P_{.1}P_{..1}} \right] = \frac{P_{211}}{P_{2..}} \log e, \\
\frac{\partial f_{212}}{\partial P_{122}} &= \frac{\partial}{\partial P_{122}} \left[ P_{212} \log \frac{P_{212}}{P_{2..}P_{.1}P_{..2}} \right] = \frac{P_{212}}{P_{2..}} \log e, \\
\frac{\partial f_{220}}{\partial P_{122}} &= \frac{\partial}{\partial P_{122}} \left[ P_{220} \log \frac{P_{220}}{P_{2..}P_{.2}P_{..0}} \right] = \frac{P_{220}}{P_{2..}} \log e, \\
\frac{\partial f_{221}}{\partial P_{122}} &= \frac{\partial}{\partial P_{122}} \left[ P_{221} \log \frac{P_{221}}{P_{2..}P_{.2}P_{..1}} \right] = \frac{P_{221}}{P_{2..}} \log e, \\
\frac{\partial f_{222}}{\partial P_{122}} &= \frac{\partial}{\partial P_{122}} \left[ P_{222} \log \frac{P_{222}}{P_{2..}P_{.2}P_{..2}} \right] = -\log \frac{P_{222}}{P_{2..}P_{.2}P_{..2}} + \left[ -1 + \frac{P_{222}}{P_{2..}} \right] \log e.
\end{aligned} \tag{A.9}$$

By relations (A.7), (A.8), and (A.9), we have

$$\begin{aligned}
\frac{\partial f}{\partial P_{122}} &= \sum_{i=0}^2 \sum_{j=0}^2 \sum_{e=0}^2 \frac{\partial f_{ije}}{\partial P_{122}} \\
&= \log \frac{P_{122}}{P_{1..}P_{.2}P_{..2}} - \log \frac{P_{222}}{P_{2..}P_{.2}P_{..2}}.
\end{aligned}$$

Similarly, we have

$$\begin{aligned}
\frac{\partial f}{\partial P_{022}} &= \log \frac{P_{022}}{P_{0..}P_{.2}P_{..2}} - \log \frac{P_{222}}{P_{2..}P_{.2}P_{..2}}, \\
\frac{\partial f}{\partial P_{202}} &= \log \frac{P_{202}}{P_{2..}P_{.0}P_{..2}} - \log \frac{P_{222}}{P_{2..}P_{.2}P_{..2}}, \\
\frac{\partial f}{\partial P_{212}} &= \log \frac{P_{212}}{P_{2..}P_{.1}P_{..2}} - \log \frac{P_{222}}{P_{2..}P_{.2}P_{..2}},
\end{aligned}$$

$$\begin{aligned}\frac{\partial f}{\partial P_{220}} &= \log \frac{P_{220}}{P_{2..}P_{.2}P_{.0}} - \log \frac{P_{222}}{P_{2..}P_{.2}P_{.2}}, \\ \frac{\partial f}{\partial P_{221}} &= \log \frac{P_{221}}{P_{2..}P_{.2}P_{.1}} - \log \frac{P_{222}}{P_{2..}P_{.2}P_{.2}}.\end{aligned}$$

## Appendix B Proof of Relations (17)

### B.1 The Subscripts $ije$ Do Not Contain 2

Notice

$$\begin{aligned}\frac{\partial h_{000}}{\partial P_{000}} &= \frac{\partial}{\partial P_{000}} \left[ P_{000} \log \frac{P_{000}P_{0..}P_{.0}P_{.0}}{P_{00.}P_{0.0}P_{.00}} \right] \\ &= \log \frac{P_{000}P_{0..}P_{.0}P_{.0}}{P_{00.}P_{0.0}P_{.00}} + \left[ 1 + \frac{P_{000}}{P_{0..}} + \frac{P_{000}}{P_{.0}} + \frac{P_{000}}{P_{.0}} - \frac{P_{000}}{P_{00.}} - \frac{P_{000}}{P_{0.0}} - \frac{P_{000}}{P_{.00}} \right] \log e, \\ \frac{\partial h_{001}}{\partial P_{000}} &= \frac{\partial}{\partial P_{000}} \left[ P_{001} \log \frac{P_{001}P_{0..}P_{.0}P_{.1}}{P_{00.}P_{0.1}P_{.01}} \right] = \left[ \frac{P_{001}}{P_{0..}} + \frac{P_{001}}{P_{.0}} - \frac{P_{001}}{P_{00.}} \right] \log e, \\ \frac{\partial h_{002}}{\partial P_{000}} &= \frac{\partial}{\partial P_{000}} \left[ P_{002} \log \frac{P_{002}P_{0..}P_{.0}P_{.2}}{P_{00.}P_{0.2}P_{.02}} \right] = \left[ \frac{P_{002}}{P_{0..}} + \frac{P_{002}}{P_{.0}} - \frac{P_{002}}{P_{.2}} - \frac{P_{002}}{P_{00.}} \right] \log e, \\ \frac{\partial h_{010}}{\partial P_{000}} &= \frac{\partial}{\partial P_{000}} \left[ P_{010} \log \frac{P_{010}P_{0..}P_{.1}P_{.0}}{P_{01.}P_{0.0}P_{.10}} \right] = \left[ \frac{P_{010}}{P_{0..}} + \frac{P_{010}}{P_{.0}} - \frac{P_{010}}{P_{0.0}} \right] \log e, \\ \frac{\partial h_{011}}{\partial P_{000}} &= \frac{\partial}{\partial P_{000}} \left[ P_{011} \log \frac{P_{011}P_{0..}P_{.1}P_{.1}}{P_{01.}P_{0.1}P_{.11}} \right] = \frac{P_{011}}{P_{0..}} \log e, \\ \frac{\partial h_{012}}{\partial P_{000}} &= \frac{\partial}{\partial P_{000}} \left[ P_{012} \log \frac{P_{012}P_{0..}P_{.1}P_{.2}}{P_{01.}P_{0.2}P_{.12}} \right] = \left[ \frac{P_{012}}{P_{0..}} - \frac{P_{012}}{P_{.2}} \right] \log e, \\ \frac{\partial h_{020}}{\partial P_{000}} &= \frac{\partial}{\partial P_{000}} \left[ P_{020} \log \frac{P_{020}P_{0..}P_{.2}P_{.0}}{P_{02.}P_{0.0}P_{.20}} \right] = \left[ \frac{P_{020}}{P_{0..}} - \frac{P_{020}}{P_{.2}} + \frac{P_{020}}{P_{.0}} - \frac{P_{020}}{P_{0.0}} \right] \log e, \\ \frac{\partial h_{021}}{\partial P_{000}} &= \frac{\partial}{\partial P_{000}} \left[ P_{021} \log \frac{P_{021}P_{0..}P_{.2}P_{.1}}{P_{02.}P_{0.1}P_{.21}} \right] = \left[ \frac{P_{021}}{P_{0..}} - \frac{P_{021}}{P_{.2}} \right] \log e, \\ \frac{\partial h_{022}}{\partial P_{000}} &= \frac{\partial}{\partial P_{000}} \left[ P_{022} \log \frac{P_{022}P_{0..}P_{.2}P_{.2}}{P_{02.}P_{0.2}P_{.22}} \right] = \left[ \frac{P_{022}}{P_{0..}} - \frac{P_{022}}{P_{.2}} - \frac{P_{022}}{P_{.2}} + \frac{P_{022}}{P_{.22}} \right] \log e.\end{aligned}\tag{B.1}$$

In addition, we have

$$\begin{aligned}\frac{\partial h_{100}}{\partial P_{000}} &= \frac{\partial}{\partial P_{000}} \left[ P_{100} \log \frac{P_{100}P_{1..}P_{.0}P_{.0}}{P_{10.}P_{1.0}P_{.00}} \right] = \left[ \frac{P_{100}}{P_{.0}} + \frac{P_{100}}{P_{.0}} - \frac{P_{100}}{P_{.00}} \right] \log e, \\ \frac{\partial h_{101}}{\partial P_{000}} &= \frac{\partial}{\partial P_{000}} \left[ P_{101} \log \frac{P_{101}P_{1..}P_{.0}P_{.1}}{P_{10.}P_{1.1}P_{.01}} \right] = \frac{P_{101}}{P_{.0}} \log e, \\ \frac{\partial h_{102}}{\partial P_{000}} &= \frac{\partial}{\partial P_{000}} \left[ P_{102} \log \frac{P_{102}P_{1..}P_{.0}P_{.2}}{P_{10.}P_{1.2}P_{.02}} \right] = \left[ \frac{P_{102}}{P_{.0}} - \frac{P_{102}}{P_{.2}} \right] \log e, \\ \frac{\partial h_{110}}{\partial P_{000}} &= \frac{\partial}{\partial P_{000}} \left[ P_{110} \log \frac{P_{110}P_{1..}P_{.1}P_{.0}}{P_{11.}P_{1.0}P_{.10}} \right] = \frac{P_{110}}{P_{.0}} \log e,\end{aligned}$$

$$\begin{aligned}
\frac{\partial h_{111}}{\partial P_{000}} &= \frac{\partial}{\partial P_{000}} \left[ P_{111} \log \frac{P_{111} P_{1..} P_{.1} P_{..1}}{P_{11.} P_{1.1} P_{.11}} \right] = 0, \\
\frac{\partial h_{112}}{\partial P_{000}} &= \frac{\partial}{\partial P_{000}} \left[ P_{112} \log \frac{P_{112} P_{1..} P_{.1} P_{..2}}{P_{11.} P_{1.2} P_{.12}} \right] = -\frac{P_{112}}{P_{..2}} \log e, \\
\frac{\partial h_{120}}{\partial P_{000}} &= \frac{\partial}{\partial P_{000}} \left[ P_{120} \log \frac{P_{120} P_{1..} P_{.2} P_{..0}}{P_{12.} P_{1.0} P_{.20}} \right] = \left[ -\frac{P_{120}}{P_{..2}} + \frac{P_{120}}{P_{..0}} \right] \log e, \\
\frac{\partial h_{121}}{\partial P_{000}} &= \frac{\partial}{\partial P_{000}} \left[ P_{121} \log \frac{P_{121} P_{1..} P_{.2} P_{..1}}{P_{12.} P_{1.1} P_{.21}} \right] = -\frac{P_{121}}{P_{..2}} \log e, \\
\frac{\partial h_{122}}{\partial P_{000}} &= \frac{\partial}{\partial P_{000}} \left[ P_{122} \log \frac{P_{122} P_{1..} P_{.2} P_{..2}}{P_{12.} P_{1.2} P_{.22}} \right] = -\left[ \frac{P_{122}}{P_{..2}} + \frac{P_{122}}{P_{..2}} + \frac{P_{122}}{P_{.22}} \right] \log e,
\end{aligned} \tag{B.2}$$

and

$$\begin{aligned}
\frac{\partial h_{200}}{\partial P_{000}} &= \frac{\partial}{\partial P_{000}} \left[ P_{200} \log \frac{P_{200} P_{2..} P_{.0} P_{..0}}{P_{20.} P_{2.0} P_{.00}} \right] = \left[ -\frac{P_{200}}{P_{..2}} + \frac{P_{200}}{P_{..0}} + \frac{P_{200}}{P_{..0}} - \frac{P_{200}}{P_{.00}} \right] \log e, \\
\frac{\partial h_{201}}{\partial P_{000}} &= \frac{\partial}{\partial P_{000}} \left[ P_{201} \log \frac{P_{201} P_{2..} P_{.0} P_{..1}}{P_{20.} P_{2.1} P_{.01}} \right] = \left[ -\frac{P_{201}}{P_{..2}} + \frac{P_{201}}{P_{..0}} \right] \log e, \\
\frac{\partial h_{202}}{\partial P_{000}} &= \frac{\partial}{\partial P_{000}} \left[ P_{202} \log \frac{P_{202} P_{2..} P_{.0} P_{..2}}{P_{20.} P_{2.2} P_{.02}} \right] = \left[ -\frac{P_{202}}{P_{..2}} + \frac{P_{202}}{P_{..0}} - \frac{P_{202}}{P_{..2}} + \frac{P_{202}}{P_{.22}} \right] \log e, \\
\frac{\partial h_{210}}{\partial P_{000}} &= \frac{\partial}{\partial P_{000}} \left[ P_{210} \log \frac{P_{210} P_{2..} P_{.1} P_{..0}}{P_{21.} P_{2.0} P_{.10}} \right] = \left[ -\frac{P_{210}}{P_{..2}} + \frac{P_{210}}{P_{..0}} \right] \log e, \\
\frac{\partial h_{211}}{\partial P_{000}} &= \frac{\partial}{\partial P_{000}} \left[ P_{211} \log \frac{P_{211} P_{2..} P_{.1} P_{..1}}{P_{21.} P_{2.1} P_{.11}} \right] = -\frac{P_{211}}{P_{..2}} \log e, \\
\frac{\partial h_{212}}{\partial P_{000}} &= \frac{\partial}{\partial P_{000}} \left[ P_{212} \log \frac{P_{212} P_{2..} P_{.1} P_{..2}}{P_{21.} P_{2.2} P_{.12}} \right] = \left[ -\frac{P_{212}}{P_{..2}} - \frac{P_{212}}{P_{..2}} + \frac{P_{212}}{P_{.22}} \right] \log e, \\
\frac{\partial h_{220}}{\partial P_{000}} &= \frac{\partial}{\partial P_{000}} \left[ P_{220} \log \frac{P_{220} P_{2..} P_{.2} P_{..0}}{P_{22.} P_{2.0} P_{.20}} \right] = \left[ -\frac{P_{220}}{P_{..2}} - \frac{P_{220}}{P_{..2}} + \frac{P_{220}}{P_{..0}} + \frac{P_{220}}{P_{.22}} \right] \log e, \\
\frac{\partial h_{221}}{\partial P_{000}} &= \frac{\partial}{\partial P_{000}} \left[ P_{221} \log \frac{P_{221} P_{2..} P_{.2} P_{..1}}{P_{22.} P_{2.1} P_{.21}} \right] = \left[ -\frac{P_{221}}{P_{..2}} - \frac{P_{221}}{P_{..2}} + \frac{P_{221}}{P_{.22}} \right] \log e, \\
\frac{\partial h_{222}}{\partial P_{000}} &= \frac{\partial}{\partial P_{000}} \left[ P_{222} \log \frac{P_{222} P_{2..} P_{.2} P_{..2}}{P_{22.} P_{2.2} P_{.22}} \right] \\
&= -\log \frac{P_{222} P_{2..} P_{.2} P_{..2}}{P_{22.} P_{2.2} P_{.22}} + \left[ -1 - \frac{P_{222}}{P_{..2}} - \frac{P_{222}}{P_{..2}} - \frac{P_{222}}{P_{..2}} + \frac{P_{222}}{P_{.22}} + \frac{P_{222}}{P_{.22}} + \frac{P_{222}}{P_{.22}} \right] \log e.
\end{aligned} \tag{B.3}$$

By relations (B.1), (B.2), and (B.3), we have

$$\begin{aligned}
\frac{\partial h}{\partial P_{000}} &= \sum_{i=0}^2 \sum_{j=0}^2 \sum_{e=0}^2 \frac{\partial h_{ije}}{\partial P_{000}} \\
&= \log \frac{P_{000} P_{0..} P_{.0} P_{..0}}{P_{00.} P_{0.0} P_{.00}} - \log \frac{P_{222} P_{2..} P_{.2} P_{..2}}{P_{22.} P_{2.2} P_{.22}}.
\end{aligned}$$



Similarly, we have for  $i, j, e = 0, 1$

$$\frac{\partial h}{\partial P_{ije}} = \log \frac{P_{ije} P_{i..} P_{.j} P_{..e}}{P_{ij} P_{i.e} P_{.je}} - \log \frac{P_{222} P_{2..} P_{.2} P_{..2}}{P_{22} P_{2.2} P_{.22}}.$$

## B.2 The Subscripts $ije$ Contain One 2

Notice

$$\begin{aligned} \frac{\partial h_{000}}{\partial P_{002}} &= \frac{\partial}{\partial P_{002}} \left[ P_{000} \log \frac{P_{000} P_{0..} P_{.0} P_{..0}}{P_{00} P_{0.0} P_{.00}} \right] = \left[ \frac{P_{000}}{P_{0..}} + \frac{P_{000}}{P_{.0}} - \frac{P_{000}}{P_{00}} \right] \log e, \\ \frac{\partial h_{001}}{\partial P_{002}} &= \frac{\partial}{\partial P_{002}} \left[ P_{001} \log \frac{P_{001} P_{0..} P_{.0} P_{..1}}{P_{00} P_{0.1} P_{.01}} \right] = \left[ \frac{P_{001}}{P_{0..}} + \frac{P_{001}}{P_{.0}} - \frac{P_{001}}{P_{00}} \right] \log e, \\ \frac{\partial h_{002}}{\partial P_{002}} &= \frac{\partial}{\partial P_{002}} \left[ P_{002} \log \frac{P_{002} P_{0..} P_{.0} P_{..2}}{P_{00} P_{0.2} P_{.02}} \right] \\ &= \log \frac{P_{002} P_{0..} P_{.0} P_{..2}}{P_{00} P_{0.2} P_{.02}} + \left[ 1 + \frac{P_{002}}{P_{0..}} + \frac{P_{002}}{P_{.0}} - \frac{P_{002}}{P_{00}} - \frac{P_{002}}{P_{0.2}} - \frac{P_{002}}{P_{.02}} \right] \log e, \\ \frac{\partial h_{010}}{\partial P_{002}} &= \frac{\partial}{\partial P_{002}} \left[ P_{010} \log \frac{P_{010} P_{0..} P_{.1} P_{..0}}{P_{01} P_{0.0} P_{.10}} \right] = \frac{P_{010}}{P_{0..}} \log e, \\ \frac{\partial h_{011}}{\partial P_{002}} &= \frac{\partial}{\partial P_{002}} \left[ P_{011} \log \frac{P_{011} P_{0..} P_{.1} P_{..1}}{P_{01} P_{0.1} P_{.11}} \right] = \frac{P_{011}}{P_{0..}} \log e, \\ \frac{\partial h_{012}}{\partial P_{002}} &= \frac{\partial}{\partial P_{002}} \left[ P_{012} \log \frac{P_{012} P_{0..} P_{.1} P_{..2}}{P_{01} P_{0.2} P_{.12}} \right] = \left[ \frac{P_{012}}{P_{0..}} - \frac{P_{012}}{P_{0.2}} \right] \log e, \\ \frac{\partial h_{020}}{\partial P_{002}} &= \frac{\partial}{\partial P_{002}} \left[ P_{020} \log \frac{P_{020} P_{0..} P_{.2} P_{..0}}{P_{02} P_{0.0} P_{.20}} \right] = \left[ \frac{P_{020}}{P_{0..}} - \frac{P_{020}}{P_{.2}} \right] \log e, \\ \frac{\partial h_{021}}{\partial P_{002}} &= \frac{\partial}{\partial P_{002}} \left[ P_{021} \log \frac{P_{021} P_{0..} P_{.2} P_{..1}}{P_{02} P_{0.1} P_{.21}} \right] = \left[ \frac{P_{021}}{P_{0..}} - \frac{P_{021}}{P_{.2}} \right] \log e, \\ \frac{\partial h_{022}}{\partial P_{002}} &= \frac{\partial}{\partial P_{002}} \left[ P_{022} \log \frac{P_{022} P_{0..} P_{.2} P_{..2}}{P_{02} P_{0.2} P_{.22}} \right] = \left[ \frac{P_{022}}{P_{0..}} - \frac{P_{022}}{P_{.2}} - \frac{P_{022}}{P_{0.2}} + \frac{P_{022}}{P_{.22}} \right] \log e. \end{aligned} \tag{B.4}$$

In addition, we have

$$\begin{aligned} \frac{\partial h_{100}}{\partial P_{002}} &= \frac{\partial}{\partial P_{002}} \left[ P_{100} \log \frac{P_{100} P_{1..} P_{.0} P_{..0}}{P_{10} P_{1.0} P_{.00}} \right] = \frac{P_{100}}{P_{.0}} \log e, \\ \frac{\partial h_{101}}{\partial P_{002}} &= \frac{\partial}{\partial P_{002}} \left[ P_{101} \log \frac{P_{101} P_{1..} P_{.0} P_{..1}}{P_{10} P_{1.1} P_{.01}} \right] = \frac{P_{101}}{P_{.0}} \log e, \\ \frac{\partial h_{102}}{\partial P_{002}} &= \frac{\partial}{\partial P_{002}} \left[ P_{102} \log \frac{P_{102} P_{1..} P_{.0} P_{..2}}{P_{10} P_{1.2} P_{.02}} \right] = \left[ \frac{P_{102}}{P_{.0}} - \frac{P_{102}}{P_{.02}} \right] \log e, \\ \frac{\partial h_{110}}{\partial P_{002}} &= \frac{\partial}{\partial P_{002}} \left[ P_{110} \log \frac{P_{110} P_{1..} P_{.1} P_{..0}}{P_{11} P_{1.0} P_{.10}} \right] = 0, \\ \frac{\partial h_{111}}{\partial P_{002}} &= \frac{\partial}{\partial P_{002}} \left[ P_{111} \log \frac{P_{111} P_{1..} P_{.1} P_{..1}}{P_{11} P_{1.1} P_{.11}} \right] = 0, \\ \frac{\partial h_{112}}{\partial P_{002}} &= \frac{\partial}{\partial P_{002}} \left[ P_{112} \log \frac{P_{112} P_{1..} P_{.1} P_{..2}}{P_{11} P_{1.2} P_{.12}} \right] = 0, \end{aligned} \tag{B.5}$$

$$\begin{aligned}
\frac{\partial h_{120}}{\partial P_{002}} &= \frac{\partial}{\partial P_{002}} \left[ P_{120} \log \frac{P_{120} P_{1..} P_{.2} P_{..0}}{P_{12.} P_{1.0} P_{.20}} \right] = -\frac{P_{120}}{P_{.2}} \log e, \\
\frac{\partial h_{121}}{\partial P_{002}} &= \frac{\partial}{\partial P_{002}} \left[ P_{121} \log \frac{P_{121} P_{1..} P_{.2} P_{..1}}{P_{12.} P_{1.1} P_{.21}} \right] = -\frac{P_{121}}{P_{.2}} \log e, \\
\frac{\partial h_{122}}{\partial P_{002}} &= \frac{\partial}{\partial P_{002}} \left[ P_{122} \log \frac{P_{122} P_{1..} P_{.2} P_{..2}}{P_{12.} P_{1.2} P_{.22}} \right] = \left[ -\frac{P_{122}}{P_{.2}} + \frac{P_{122}}{P_{.22}} \right] \log e,
\end{aligned}$$

and

$$\begin{aligned}
\frac{\partial h_{200}}{\partial P_{002}} &= \frac{\partial}{\partial P_{002}} \left[ P_{200} \log \frac{P_{200} P_{2..} P_{.0} P_{..0}}{P_{20.} P_{2.0} P_{.00}} \right] = \left[ -\frac{P_{200}}{P_{2..}} + \frac{P_{200}}{P_{.0}} \right] \log e, \\
\frac{\partial h_{201}}{\partial P_{002}} &= \frac{\partial}{\partial P_{002}} \left[ P_{201} \log \frac{P_{201} P_{2..} P_{.0} P_{..1}}{P_{20.} P_{2.1} P_{.01}} \right] = \left[ -\frac{P_{201}}{P_{2..}} + \frac{P_{201}}{P_{.0}} \right] \log e, \\
\frac{\partial h_{202}}{\partial P_{002}} &= \frac{\partial}{\partial P_{002}} \left[ P_{202} \log \frac{P_{202} P_{2..} P_{.0} P_{..2}}{P_{20.} P_{2.2} P_{.02}} \right] = \left[ -\frac{P_{202}}{P_{2..}} + \frac{P_{202}}{P_{.0}} - \frac{P_{202}}{P_{.02}} + \frac{P_{202}}{P_{2.2}} \right] \log e, \\
\frac{\partial h_{210}}{\partial P_{002}} &= \frac{\partial}{\partial P_{002}} \left[ P_{210} \log \frac{P_{210} P_{2..} P_{.1} P_{..0}}{P_{21.} P_{2.0} P_{.10}} \right] = -\frac{P_{210}}{P_{2..}} \log e, \\
\frac{\partial h_{211}}{\partial P_{002}} &= \frac{\partial}{\partial P_{002}} \left[ P_{211} \log \frac{P_{211} P_{2..} P_{.1} P_{..1}}{P_{21.} P_{2.1} P_{.11}} \right] = -\frac{P_{211}}{P_{2..}} \log e, \\
\frac{\partial h_{212}}{\partial P_{002}} &= \frac{\partial}{\partial P_{002}} \left[ P_{212} \log \frac{P_{212} P_{2..} P_{.1} P_{..2}}{P_{21.} P_{2.2} P_{.12}} \right] = \left[ -\frac{P_{212}}{P_{2..}} + \frac{P_{212}}{P_{2.2}} \right] \log e, \\
\frac{\partial h_{220}}{\partial P_{002}} &= \frac{\partial}{\partial P_{002}} \left[ P_{220} \log \frac{P_{220} P_{2..} P_{.2} P_{..0}}{P_{22.} P_{2.0} P_{.20}} \right] = \left[ -\frac{P_{220}}{P_{2..}} - \frac{P_{220}}{P_{.2}} + \frac{P_{220}}{P_{22.}} \right] \log e, \\
\frac{\partial h_{221}}{\partial P_{002}} &= \frac{\partial}{\partial P_{002}} \left[ P_{221} \log \frac{P_{221} P_{2..} P_{.2} P_{..1}}{P_{22.} P_{2.1} P_{.21}} \right] = \left[ -\frac{P_{221}}{P_{2..}} - \frac{P_{221}}{P_{.2}} + \frac{P_{221}}{P_{22.}} \right] \log e, \\
\frac{\partial h_{222}}{\partial P_{002}} &= \frac{\partial}{\partial P_{002}} \left[ P_{222} \log \frac{P_{222} P_{2..} P_{.2} P_{..2}}{P_{22.} P_{2.2} P_{.22}} \right] \\
&= -\log \frac{P_{222} P_{2..} P_{.2} P_{..2}}{P_{22.} P_{2.2} P_{.22}} + \left[ -1 - \frac{P_{222}}{P_{2..}} - \frac{P_{222}}{P_{.2}} + \frac{P_{222}}{P_{22.}} + \frac{P_{222}}{P_{2.2}} + \frac{P_{222}}{P_{.22}} \right] \log e.
\end{aligned} \tag{B.6}$$

By relations (B.4), (B.5), and (B.6), we have

$$\begin{aligned}
\frac{\partial h}{\partial P_{002}} &= \sum_{i=0}^2 \sum_{j=0}^2 \sum_{e=0}^2 \frac{\partial h_{ije}}{\partial P_{002}} \\
&= \log \frac{P_{002} P_{0..} P_{.0} P_{..2}}{P_{00.} P_{0.2} P_{.02}} - \log \frac{P_{222} P_{2..} P_{.2} P_{..2}}{P_{22.} P_{2.2} P_{.22}}.
\end{aligned}$$

Similarly, we can show relations (17) when the subscripts  $ije$  contain one 2.

### B.3 The Subscripts $ije$ Contain Two 2

Notice

$$\begin{aligned}
\frac{\partial h_{000}}{\partial P_{122}} &= \frac{\partial}{\partial P_{122}} \left[ P_{000} \log \frac{P_{000} P_{0..} P_{.0.} P_{..0}}{P_{00.} P_{0.0} P_{.00}} \right] = 0, \\
\frac{\partial h_{001}}{\partial P_{122}} &= \frac{\partial}{\partial P_{122}} \left[ P_{001} \log \frac{P_{001} P_{0..} P_{.0.} P_{..1}}{P_{00.} P_{0.1} P_{.01}} \right] = 0, \\
\frac{\partial h_{002}}{\partial P_{122}} &= \frac{\partial}{\partial P_{122}} \left[ P_{002} \log \frac{P_{002} P_{0..} P_{.0.} P_{..2}}{P_{00.} P_{0.2} P_{.02}} \right] = 0, \\
\frac{\partial h_{010}}{\partial P_{122}} &= \frac{\partial}{\partial P_{122}} \left[ P_{010} \log \frac{P_{010} P_{0..} P_{.1.} P_{..0}}{P_{01.} P_{0.0} P_{.10}} \right] = 0, \\
\frac{\partial h_{011}}{\partial P_{122}} &= \frac{\partial}{\partial P_{122}} \left[ P_{011} \log \frac{P_{011} P_{0..} P_{.1.} P_{..1}}{P_{01.} P_{0.1} P_{.11}} \right] = 0, \\
\frac{\partial h_{012}}{\partial P_{122}} &= \frac{\partial}{\partial P_{122}} \left[ P_{012} \log \frac{P_{012} P_{0..} P_{.1.} P_{..2}}{P_{01.} P_{0.2} P_{.12}} \right] = 0, \\
\frac{\partial h_{020}}{\partial P_{122}} &= \frac{\partial}{\partial P_{122}} \left[ P_{020} \log \frac{P_{020} P_{0..} P_{.2.} P_{..0}}{P_{02.} P_{0.0} P_{.20}} \right] = 0, \\
\frac{\partial h_{021}}{\partial P_{122}} &= \frac{\partial}{\partial P_{122}} \left[ P_{021} \log \frac{P_{021} P_{0..} P_{.2.} P_{..1}}{P_{02.} P_{0.1} P_{.21}} \right] = 0, \\
\frac{\partial h_{022}}{\partial P_{122}} &= \frac{\partial}{\partial P_{122}} \left[ P_{022} \log \frac{P_{022} P_{0..} P_{.2.} P_{..2}}{P_{02.} P_{0.2} P_{.22}} \right] = 0.
\end{aligned} \tag{B.7}$$

In addition, we have

$$\begin{aligned}
\frac{\partial h_{100}}{\partial P_{122}} &= \frac{\partial}{\partial P_{122}} \left[ P_{100} \log \frac{P_{100} P_{1..} P_{.0.} P_{..0}}{P_{10.} P_{1.0} P_{.00}} \right] = \frac{P_{100}}{P_{1..}} \log e, \\
\frac{\partial h_{101}}{\partial P_{122}} &= \frac{\partial}{\partial P_{122}} \left[ P_{101} \log \frac{P_{101} P_{1..} P_{.0.} P_{..1}}{P_{10.} P_{1.1} P_{.01}} \right] = \frac{P_{101}}{P_{1..}} \log e, \\
\frac{\partial h_{102}}{\partial P_{122}} &= \frac{\partial}{\partial P_{122}} \left[ P_{102} \log \frac{P_{102} P_{1..} P_{.0.} P_{..2}}{P_{10.} P_{1.2} P_{.02}} \right] = \left[ \frac{P_{102}}{P_{1..}} - \frac{P_{102}}{P_{1.2}} \right] \log e, \\
\frac{\partial h_{110}}{\partial P_{122}} &= \frac{\partial}{\partial P_{122}} \left[ P_{110} \log \frac{P_{110} P_{1..} P_{.1.} P_{..0}}{P_{11.} P_{1.0} P_{.10}} \right] = \frac{P_{110}}{P_{1..}} \log e, \\
\frac{\partial h_{111}}{\partial P_{122}} &= \frac{\partial}{\partial P_{122}} \left[ P_{111} \log \frac{P_{111} P_{1..} P_{.1.} P_{..1}}{P_{11.} P_{1.1} P_{.11}} \right] = \frac{P_{111}}{P_{1..}} \log e, \\
\frac{\partial h_{112}}{\partial P_{122}} &= \frac{\partial}{\partial P_{122}} \left[ P_{112} \log \frac{P_{112} P_{1..} P_{.1.} P_{..2}}{P_{11.} P_{1.2} P_{.12}} \right] = \left[ \frac{P_{112}}{P_{1..}} - \frac{P_{112}}{P_{1.2}} \right] \log e, \\
\frac{\partial h_{120}}{\partial P_{122}} &= \frac{\partial}{\partial P_{122}} \left[ P_{120} \log \frac{P_{120} P_{1..} P_{.2.} P_{..0}}{P_{12.} P_{1.0} P_{.20}} \right] = \left[ \frac{P_{120}}{P_{1..}} - \frac{P_{120}}{P_{1.2}} \right] \log e, \\
\frac{\partial h_{121}}{\partial P_{122}} &= \frac{\partial}{\partial P_{122}} \left[ P_{121} \log \frac{P_{121} P_{1..} P_{.2.} P_{..1}}{P_{12.} P_{1.1} P_{.21}} \right] = \left[ \frac{P_{121}}{P_{1..}} - \frac{P_{121}}{P_{1.2}} \right] \log e, \\
\frac{\partial h_{122}}{\partial P_{122}} &= \frac{\partial}{\partial P_{122}} \left[ P_{122} \log \frac{P_{122} P_{1..} P_{.2.} P_{..2}}{P_{12.} P_{1.2} P_{.22}} \right] \\
&= \log \frac{P_{122} P_{1..} P_{.2.} P_{..2}}{P_{12.} P_{1.2} P_{.22}} + \left[ 1 + \frac{P_{122}}{P_{1..}} - \frac{P_{122}}{P_{1.2}} - \frac{P_{122}}{P_{1.2}} \right] \log e,
\end{aligned} \tag{B.8}$$

and

$$\begin{aligned}
\frac{\partial h_{200}}{\partial P_{122}} &= \frac{\partial}{\partial P_{122}} \left[ P_{200} \log \frac{P_{200} P_{2..} P_{.0.} P_{..0}}{P_{20.} P_{2.0} P_{.00}} \right] = -\frac{P_{200}}{P_{2..}} \log e, \\
\frac{\partial h_{201}}{\partial P_{122}} &= \frac{\partial}{\partial P_{122}} \left[ P_{201} \log \frac{P_{201} P_{2..} P_{.0.} P_{..1}}{P_{20.} P_{2.1} P_{.01}} \right] = -\frac{P_{201}}{P_{2..}} \log e, \\
\frac{\partial h_{202}}{\partial P_{122}} &= \frac{\partial}{\partial P_{122}} \left[ P_{202} \log \frac{P_{202} P_{2..} P_{.0.} P_{..2}}{P_{20.} P_{2.2} P_{.02}} \right] = \left[ -\frac{P_{202}}{P_{2..}} + \frac{P_{202}}{P_{2.2}} \right] \log e, \\
\frac{\partial h_{210}}{\partial P_{122}} &= \frac{\partial}{\partial P_{122}} \left[ P_{210} \log \frac{P_{210} P_{2..} P_{.1.} P_{..0}}{P_{21.} P_{2.0} P_{.10}} \right] = -\frac{P_{210}}{P_{2..}} \log e, \\
\frac{\partial h_{211}}{\partial P_{122}} &= \frac{\partial}{\partial P_{122}} \left[ P_{211} \log \frac{P_{211} P_{2..} P_{.1.} P_{..1}}{P_{21.} P_{2.1} P_{.11}} \right] = -\frac{P_{211}}{P_{2..}} \log e, \\
\frac{\partial h_{212}}{\partial P_{122}} &= \frac{\partial}{\partial P_{122}} \left[ P_{212} \log \frac{P_{212} P_{2..} P_{.1.} P_{..2}}{P_{21.} P_{2.2} P_{.12}} \right] = \left[ -\frac{P_{212}}{P_{2..}} + \frac{P_{212}}{P_{2.2}} \right] \log e, \\
\frac{\partial h_{220}}{\partial P_{122}} &= \frac{\partial}{\partial P_{122}} \left[ P_{220} \log \frac{P_{220} P_{2..} P_{.2.} P_{..0}}{P_{22.} P_{2.0} P_{.20}} \right] = \left[ -\frac{P_{220}}{P_{2..}} + \frac{P_{220}}{P_{2.2}} \right] \log e, \\
\frac{\partial h_{221}}{\partial P_{122}} &= \frac{\partial}{\partial P_{122}} \left[ P_{221} \log \frac{P_{221} P_{2..} P_{.2.} P_{..1}}{P_{22.} P_{2.1} P_{.21}} \right] = \left[ -\frac{P_{221}}{P_{2..}} + \frac{P_{221}}{P_{2.2}} \right] \log e, \\
\frac{\partial h_{222}}{\partial P_{122}} &= \frac{\partial}{\partial P_{122}} \left[ P_{222} \log \frac{P_{222} P_{2..} P_{.2.} P_{..2}}{P_{22.} P_{2.2} P_{.22}} \right] \\
&= -\log \frac{P_{222} P_{2..} P_{.2.} P_{..2}}{P_{22.} P_{2.2} P_{.22}} + \left[ -1 - \frac{P_{222}}{P_{2..}} + \frac{P_{222}}{P_{2.2}} + \frac{P_{222}}{P_{2.2}} \right] \log e.
\end{aligned} \tag{B.9}$$

By relations (B.7), (B.8), and (B.9), we have

$$\begin{aligned}
\frac{\partial h}{\partial P_{122}} &= \sum_{i=0}^2 \sum_{j=0}^2 \sum_{e=0}^2 \frac{\partial h_{ije}}{\partial P_{122}} \\
&= \log \frac{P_{122} P_{1..} P_{.2.} P_{..2}}{P_{12.} P_{1.2} P_{.22}} - \log \frac{P_{222} P_{2..} P_{.2.} P_{..2}}{P_{22.} P_{2.2} P_{.22}}.
\end{aligned}$$

Similarly, we have

$$\begin{aligned}
\frac{\partial h}{\partial P_{022}} &= \log \frac{P_{022} P_{0..} P_{.2.} P_{..2}}{P_{02.} P_{0.2} P_{.22}} - \log \frac{P_{222} P_{2..} P_{.2.} P_{..2}}{P_{22.} P_{2.2} P_{.22}}, \\
\frac{\partial h}{\partial P_{202}} &= \log \frac{P_{202} P_{2..} P_{.0.} P_{..2}}{P_{20.} P_{2.2} P_{.02}} - \log \frac{P_{222} P_{2..} P_{.2.} P_{..2}}{P_{22.} P_{2.2} P_{.22}}, \\
\frac{\partial h}{\partial P_{212}} &= \log \frac{P_{212} P_{2..} P_{.1.} P_{..2}}{P_{21.} P_{2.2} P_{.12}} - \log \frac{P_{222} P_{2..} P_{.2.} P_{..2}}{P_{22.} P_{2.2} P_{.22}}, \\
\frac{\partial h}{\partial P_{220}} &= \log \frac{P_{220} P_{2..} P_{.2.} P_{..0}}{P_{22.} P_{2.0} P_{.20}} - \log \frac{P_{222} P_{2..} P_{.2.} P_{..2}}{P_{22.} P_{2.2} P_{.22}}, \\
\frac{\partial h}{\partial P_{221}} &= \log \frac{P_{221} P_{2..} P_{.2.} P_{..1}}{P_{22.} P_{2.1} P_{.21}} - \log \frac{P_{222} P_{2..} P_{.2.} P_{..2}}{P_{22.} P_{2.2} P_{.22}}.
\end{aligned}$$

## Appendix C Proof of Relations (19) and (20)

Notice

$$\begin{aligned}
\frac{\partial h}{\partial P_{0\dots 0}} &= \sum_{a_1=0}^2 \cdots \sum_{a_K=0}^2 \frac{\partial h_{a_1\dots a_K}}{\partial P_{0\dots 0}} \\
&= \sum_{a_1=0}^2 \cdots \sum_{a_K=0}^2 \frac{\partial}{\partial P_{0\dots 0}} \left[ P_{a_1\dots a_K} \log \frac{P_{a_1\dots a_K} \prod_{\substack{\bar{s} \subset (a_1, \dots, a_K) \\ |(a_1, \dots, a_K) \setminus \bar{s}|_{\text{mod}(2)}=0}} P_{\bar{s}}}{\prod_{\substack{\bar{s} \subset (a_1, \dots, a_K) \\ |(a_1, \dots, a_K) \setminus \bar{s}|_{\text{mod}(2)}=1}} P_{\bar{s}}} \right] \\
&= \log \frac{P_{0\dots 0} \prod_{\substack{\bar{s} \subset (0, \dots, 0) \\ |(0, \dots, 0) \setminus \bar{s}|_{\text{mod}(2)}=0}} P_{\bar{s}}}{\prod_{\substack{\bar{s} \subset (0, \dots, 0) \\ |(0, \dots, 0) \setminus \bar{s}|_{\text{mod}(2)}=1}} P_{\bar{s}}} - \log \frac{P_{2\dots 2} \prod_{\substack{\bar{s} \subset (2, \dots, 2) \\ |(2, \dots, 2) \setminus \bar{s}|_{\text{mod}(2)}=0}} P_{\bar{s}}}{\prod_{\substack{\bar{s} \subset (2, \dots, 2) \\ |(2, \dots, 2) \setminus \bar{s}|_{\text{mod}(2)}=1}} P_{\bar{s}}} \\
&\quad + \sum_{a_1=0}^2 \cdots \sum_{a_K=0}^2 P_{a_1\dots a_K} \frac{\partial}{\partial P_{0\dots 0}} \left[ \log \frac{\prod_{\substack{\bar{s} \subset (a_1, \dots, a_K) \\ |(a_1, \dots, a_K) \setminus \bar{s}|_{\text{mod}(2)}=0}} P_{\bar{s}}}{\prod_{\substack{\bar{s} \subset (a_1, \dots, a_K) \\ |(a_1, \dots, a_K) \setminus \bar{s}|_{\text{mod}(2)}=1}} P_{\bar{s}}} \right]. \tag{C.1}
\end{aligned}$$

It can be showed that

$$\sum_{a_1=0}^2 \cdots \sum_{a_K=0}^2 P_{a_1\dots a_K} \frac{\partial}{\partial P_{0\dots 0}} \left[ \log \prod_{\substack{\bar{s} \subset (a_1, \dots, a_K) \\ |(a_1, \dots, a_K) \setminus \bar{s}|=i}} P_{\bar{s}} \right] = 0, \quad i = 1, 2, \dots, K-1.$$

Therefore, we have

$$\begin{aligned}
&\sum_{a_1=0}^2 \cdots \sum_{a_K=0}^2 P_{a_1\dots a_K} \frac{\partial}{\partial P_{0\dots 0}} \left[ \log \frac{\prod_{\substack{\bar{s} \subset (a_1, \dots, a_K) \\ |(a_1, \dots, a_K) \setminus \bar{s}|_{\text{mod}(2)}=0}} P_{\bar{s}}}{\prod_{\substack{\bar{s} \subset (a_1, \dots, a_K) \\ |(a_1, \dots, a_K) \setminus \bar{s}|_{\text{mod}(2)}=1}} P_{\bar{s}}} \right] \\
&= \sum_{a_1=0}^2 \cdots \sum_{a_K=0}^2 P_{a_1\dots a_K} \frac{\partial}{\partial P_{0\dots 0}} \left[ \log \prod_{\substack{\bar{s} \subset (a_1, \dots, a_K) \\ |(a_1, \dots, a_K) \setminus \bar{s}|_{\text{mod}(2)}=0}} P_{\bar{s}} \right] \\
&\quad - \sum_{a_1=0}^2 \cdots \sum_{a_K=0}^2 P_{a_1\dots a_K} \frac{\partial}{\partial P_{0\dots 0}} \left[ \log \prod_{\substack{\bar{s} \subset (a_1, \dots, a_K) \\ |(a_1, \dots, a_K) \setminus \bar{s}|_{\text{mod}(2)}=1}} P_{\bar{s}} \right] \\
&= 0.
\end{aligned}$$

Thus, the equation (C.1) implies

$$\frac{\partial h}{\partial P_{0\dots 0}} = \log \frac{P_{0\dots 0} \prod_{\substack{\bar{s} \subset (0, \dots, 0) \\ |(0, \dots, 0) \setminus \bar{s}|_{\text{mod}(2)}=0}} P_{\bar{s}}}{\prod_{\substack{\bar{s} \subset (0, \dots, 0) \\ |(0, \dots, 0) \setminus \bar{s}|_{\text{mod}(2)}=1}} P_{\bar{s}}} - \log \frac{P_{2\dots 2} \prod_{\substack{\bar{s} \subset (2, \dots, 2) \\ |(2, \dots, 2) \setminus \bar{s}|_{\text{mod}(2)}=0}} P_{\bar{s}}}{\prod_{\substack{\bar{s} \subset (2, \dots, 2) \\ |(2, \dots, 2) \setminus \bar{s}|_{\text{mod}(2)}=1}} P_{\bar{s}}}.$$

Similarly, we may show the relations (19) and (20).

## Appendix D SNP Combinations Used to Calculate the Empirical Type I Error Rates

In Table D.1, we present the SNP combinations and their joint genotype frequencies used in the calculations of empirical type I error rates of  $T_{IG}$ ,  $T_{IIG}$ , and  $T_{TCIG}$ .

In Table D.2, we present the three SNP combinations used to calculate the empirical type I error rates of test statistic  $T_{IIG}$ . The three SNPs in each combination are strongly correlated to each other. Consider a combination of three SNPs  $A$ ,  $B$ , and  $C$ . By significantly correlated to each other for the three SNPs, we mean all the four null hypotheses,

$$H_1 : P(G_A, G_B, G_C) = P(G_A, G_B)P(G_C),$$

$$H_2 : P(G_A, G_B, G_C) = P(G_A)P(G_B, G_C),$$

$$H_3 : P(G_A, G_B, G_C) = P(G_B)P(G_A, G_C),$$

$$H_4 : P(G_A, G_B, G_C) = P(G_A)P(G_B)P(G_C),$$

all unlikely to be true. We use the Pearson  $\chi^2$  test to screen the three SNP combinations. The empirical type I error rates are reported in Table 2.

Table D.1: Joint genotype frequencies of bladder cancer data used to calculate the type I error rates of 2-way test statistic  $T_{IG}$  and 3-way test statistics  $T_{IG}$  and  $T_{TCIG}$  in Table 2.

| Test     | SNPs used to generate<br>Joint Genotype Frequency | Joint Genotype Frequencies |         |         |         |         |         |         |         |         |            |                             |         |         |         |         |         |         |         |         |         |
|----------|---------------------------------------------------|----------------------------|---------|---------|---------|---------|---------|---------|---------|---------|------------|-----------------------------|---------|---------|---------|---------|---------|---------|---------|---------|---------|
| $T_{IG}$ | Xpd_751, Xpd_312                                  | 0.27907                    | 0.07513 | 0.02683 | 0.10733 | 0.34526 | 0.03399 | 0.00894 | 0.05903 | 0.06440 | 0.08229    | 0.01789                     | 0.01252 | 0.03578 | 0.08766 | 0.00537 | 0.00358 | 0.01431 | 0.01252 |         |         |
|          | Xpd_751, Xpd_312, APE1_148                        | 0.13775                    | 0.03936 | 0.01252 | 0.06082 | 0.18068 | 0.02147 | 0.00179 | 0.02683 | 0.02862 | 0.05903    | 0.01789                     | 0.00179 | 0.01073 | 0.07692 | 0.00716 | 0.00358 | 0.01789 | 0.02326 |         |         |
|          | Xpd_751, Xpd_312, XPC PAT                         | 0.09302                    | 0.13059 | 0.05546 | 0.01968 | 0.03399 | 0.02147 | 0.00537 | 0.01789 | 0.00358 | 0.03757    | 0.04830                     | 0.02147 | 0.12343 | 0.15027 | 0.07156 | 0.01431 | 0.01252 | 0.00716 |         |         |
|          |                                                   | 0.00000                    | 0.00537 | 0.00358 | 0.01789 | 0.02326 | 0.01789 | 0.01610 | 0.03578 | 0.01252 | 0.09123    | 0.11628                     | 0.07156 | 0.01610 | 0.04114 | 0.01789 | 0.01252 | 0.00537 | 0.00894 |         |         |
|          |                                                   | 0.02683                    | 0.04472 | 0.03578 | 0.12880 | 0.12522 | 0.09123 | 0.00894 | 0.01789 | 0.00716 | 0.00358    | 0.00179                     | 0.00358 | 0.01610 | 0.02504 | 0.01789 | 0.01610 | 0.02504 | 0.02326 |         |         |
|          |                                                   | 0.09481                    | 0.03936 | 0.01431 | 0.04472 | 0.11807 | 0.00894 | 0.00358 | 0.02504 | 0.02862 | 0.14132    | 0.02683                     | 0.01252 | 0.04114 | 0.18784 | 0.02326 | 0.00537 | 0.02326 | 0.02683 |         |         |
|          |                                                   | 0.04293                    | 0.00894 | 0.00000 | 0.02147 | 0.03936 | 0.00179 | 0.00000 | 0.01073 | 0.00894 | 0.12701    | 0.02862                     | 0.01789 | 0.10376 | 0.03578 | 0.00537 | 0.04830 | 0.01073 | 0.00358 |         |         |
|          |                                                   | 0.04830                    | 0.13059 | 0.00894 | 0.03757 | 0.17174 | 0.01789 | 0.02147 | 0.04293 | 0.00716 | 0.00537    | 0.02504                     | 0.02504 | 0.00358 | 0.02326 | 0.02147 | 0.00000 | 0.01073 | 0.01789 |         |         |
|          |                                                   | 0.09302                    | 0.01073 | 0.00358 | 0.30054 | 0.03757 | 0.00716 | 0.02326 | 0.00716 | 0.00358 | 0.00894    | 0.00000                     | 0.00000 | 0.05009 | 0.00894 | 0.00000 | 0.04830 | 0.01431 | 0.00179 |         |         |
|          |                                                   | 0.10018                    | 0.01073 | 0.00358 | 0.08766 | 0.01252 | 0.00179 | 0.05367 | 0.00000 | 0.00179 | 0.16816    | 0.03399                     | 0.00358 | 0.17531 | 0.03399 | 0.01610 | 0.07156 | 0.00179 | 0.00537 |         |         |
|          |                                                   | 0.07156                    | 0.02326 | 0.00179 | 0.08050 | 0.01073 | 0.00179 | 0.02147 | 0.00000 | 0.00000 | $T_{TCIG}$ | Xpd_751, Xpd_312, XRCC3_241 | 0.13239 | 0.02254 | 0.00845 | 0.15211 | 0.01972 | 0.00563 | 0.04507 | 0.00563 | 0.00563 |
|          | Xpd_751, Xpd_312, XRCC1_194                       | 0.12958                    | 0.00563 | 0.01127 | 0.19155 | 0.02535 | 0.01408 | 0.03662 | 0.02535 | 0.00563 |            |                             |         |         |         |         |         |         |         |         |         |
|          | 0.05352                                           | 0.01690                    | 0.00000 | 0.03662 | 0.01127 | 0.00000 | 0.03099 | 0.00845 | 0.00000 |         |            |                             |         |         |         |         |         |         |         |         |         |
|          | 0.07513                                           | 0.00894                    | 0.00358 | 0.17352 | 0.02862 | 0.00894 | 0.06261 | 0.01610 | 0.00000 |         |            |                             |         |         |         |         |         |         |         |         |         |
|          | 0.11807                                           | 0.01073                    | 0.00358 | 0.19499 | 0.03220 | 0.01252 | 0.09123 | 0.00179 | 0.02326 |         |            |                             |         |         |         |         |         |         |         |         |         |
|          | 0.04830                                           | 0.00358                    | 0.00000 | 0.04651 | 0.00894 | 0.00358 | 0.01968 | 0.00179 | 0.00179 |         |            |                             |         |         |         |         |         |         |         |         |         |
|          | 0.04789                                           | 0.07606                    | 0.01408 | 0.10141 | 0.07887 | 0.02535 | 0.01408 | 0.04507 | 0.00845 |         |            |                             |         |         |         |         |         |         |         |         |         |
|          | 0.03380                                           | 0.06761                    | 0.00563 | 0.07324 | 0.10986 | 0.05634 | 0.04225 | 0.05634 | 0.00563 |         |            |                             |         |         |         |         |         |         |         |         |         |
|          | 0.01690                                           | 0.01690                    | 0.00563 | 0.04507 | 0.02817 | 0.00845 | 0.00845 | 0.00282 | 0.00563 |         |            |                             |         |         |         |         |         |         |         |         |         |
|          | 0.11831                                           | 0.03380                    | 0.01127 | 0.17746 | 0.01127 | 0.01127 | 0.04507 | 0.00000 | 0.00282 |         |            |                             |         |         |         |         |         |         |         |         |         |
|          | 0.11268                                           | 0.02817                    | 0.00845 | 0.18028 | 0.05070 | 0.00282 | 0.05634 | 0.00563 | 0.00563 |         |            |                             |         |         |         |         |         |         |         |         |         |
|          | 0.05915                                           | 0.01127                    | 0.00000 | 0.04225 | 0.00000 | 0.00563 | 0.01690 | 0.00000 | 0.00282 |         |            |                             |         |         |         |         |         |         |         |         |         |

Table D.2: Three SNP combinations used to calculate the empirical type I error rates of test  $T_{IIIG}$ . In each combination, the three SNPs are strongly correlated to each other. In the Table,  $P(A, B, C) = P(G_A, G_B, G_C)$  means the joint genotype probability of three SNPs  $A, B$ , and  $C$ , etc.

| SNPs      |           |           | The Null Hypothesis $H_0$ , Test Values and the Related P-values of Pearson $\chi^2$ Statistic |              |                            |            |                            |              |                             |             |
|-----------|-----------|-----------|------------------------------------------------------------------------------------------------|--------------|----------------------------|------------|----------------------------|--------------|-----------------------------|-------------|
| A         | B         | C         | $P(A, B, C) = P(A, B)P(C)$                                                                     |              | $P(A, B, C) = P(A)P(B, C)$ |            | $P(A, B, C) = P(B)P(A, C)$ |              | $P(A, B, C) = P(A)P(B)P(C)$ |             |
|           |           |           | $\chi^2$                                                                                       | P-value      | $\chi^2$                   | P-value    | $\chi^2$                   | P-value      | $\chi^2$                    | P-value     |
| APEI      | XRCC1_399 | XRCC1_194 | 27.72382                                                                                       | 0.03410582   | 27.02576                   | 0.04119771 | 40.75471                   | 0.0006034846 | 32.56543                    | 0.03763361  |
| Xpd_751   | Xpd_312   | XRCC1_194 | 26.23323                                                                                       | 0.05083355   | 27.22967                   | 0.03899995 | 38.98301                   | 0.001093773  | 34.63468                    | 0.02213853  |
| XRCC3_241 | APEI      | XRCC1_194 | 42.08023                                                                                       | 0.0003838726 | 30.2027                    | 0.01697913 | 75.70076                   | 9.810734e-10 | 53.44553                    | 6.98728e-05 |
| XRCC3_241 | APEI      | XRCC1_399 | 29.35457                                                                                       | 0.021652     | 24.76337                   | 0.074107   | 32.45247                   | 0.008726808  | 34.3638                     | 0.02376652  |
| XRCC3_241 | XRCC1_399 | XRCC1_194 | 25.38762                                                                                       | 0.0632772    | 26.1351                    | 0.05215666 | 42.28494                   | 0.0003577711 | 31.26234                    | 0.05182107  |



## Appendix E Extra Type I Error Rates

In Table E.1, we presented the type I error rates of 1-way entropy loss test statistic  $T_{EL}$ . The test was reasonably robust.

Table E.1: Type I error rates of 1-way test statistic  $T_{EL}$  at a nominal level  $\alpha = 0.01$ . One di-allelic marker  $A$  is used in the simulation. Each of the entries was based on 100,000 simulations.

| Frequency | Sample Sizes $M = N$ |         |         |         |         |         |         |         |         |
|-----------|----------------------|---------|---------|---------|---------|---------|---------|---------|---------|
|           | 100                  | 150     | 200     | 250     | 300     | 400     | 500     | 600     | 700     |
| 0.1       | 0.01632              | 0.01428 | 0.01410 | 0.01318 | 0.01271 | 0.01226 | 0.01115 | 0.01124 | 0.01116 |
| 0.2       | 0.01932              | 0.01430 | 0.01280 | 0.01243 | 0.01171 | 0.01137 | 0.01105 | 0.01063 | 0.01073 |
| 0.3       | 0.01479              | 0.01315 | 0.01232 | 0.01083 | 0.01135 | 0.01061 | 0.01007 | 0.01060 | 0.01072 |
| 0.4       | 0.00856              | 0.00797 | 0.00912 | 0.00858 | 0.00963 | 0.00920 | 0.00945 | 0.00967 | 0.00967 |
| 0.5       | 0.00366              | 0.00487 | 0.00609 | 0.00684 | 0.00713 | 0.00765 | 0.00825 | 0.00874 | 0.00853 |
